# Supplementary material
Source: HighWire-hosted journal article supplement (https://www.cmajopen.ca/highwire/filestream/80822/field_highwire_adjunct_files/3/open-2014-0034-original-submission.pdf)
Supplement: open-2014-0034-original-submission.pdf [file open-2014-0034-original-submission.pdf]

1  
2  
3 **What's in a name? Belgian "life-ending acts without explicit**  
4 **request" revisited**

5  
6 Kenneth Chambaere<sup>1\*</sup>, MSc PhD

7 Jan L Bernheim<sup>1</sup>, MD PhD

8 James Downar<sup>2,3</sup>, MDCM MHSc

9 Luc Deliens<sup>1,4</sup>, MSc PhD

10  
11 <sup>1</sup> End-of-Life Care Research Group, Vrije Universiteit Brussel (VUB) & Ghent  
12 University, Brussels, Belgium

13 <sup>2</sup> Department of Medicine, University Health Network, Toronto, Canada

14 <sup>3</sup> University of Toronto, Toronto, Canada

15 <sup>4</sup> VU University Medical Centre, Department of Public and Occupational Health, EMGO  
16 Institute, Amsterdam, the Netherlands

17  
18 \* Corresponding author - [kenneth.chambaere@vub.ac.be](mailto:kenneth.chambaere@vub.ac.be)

19  
20 *Funding statement*

21 This study was funded by the Agency for the Promotion of Innovation  
22 by Science and Technology - Flanders (IWT Vlaanderen - grant number  
23 IWT050158). The funding agreement ensured the authors' independence  
24 in designing the study, interpreting the data, writing and  
25 publishing the report. KC is Postdoctoral Fellow of the Research  
26 Foundation - Flanders (FWO).  
27

28  
29 *Authors' contributions*

30 Conception and design of the study: JB, KC, LD

31 Acquisition of the data: KC, LD

32 Analysis of the data: KC, JD

33 Interpretation of the data: KC, JB, JD, LD

34 Drafting the work: KC, JB

35 Critical revisions of intellectual content: KC, JB, JD, LD

36 Final approval of the version to be published: KC, JB, JD, LD

37 All authors agree to be accountable for all aspects of the work in  
38 ensuring that questions related to the accuracy or integrity of any  
39 part of the work are appropriately investigated and resolved.  
40  
41

42  
43 *Acknowledgments*

44 We primarily thank the Flemish Agency for Care and Health and lawyer  
45 Wim De Brock for their participation in the organization of the data  
46 collection. Geert Pousset deserves special praise for his part in  
47 conducting the data collection. We further thank the Belgian Medical  
48 Disciplinary Board for recommending the study. We are finally deeply  
49 indebted to all anonymous physicians who participated in the survey.  
50

51  
52 *Competing interests*

53 The authors declare no competing interests.

54 Body text word count: 2487/2500

55 Abstract word count: 238/250

56 References: 33

57 Tables: 3  
58  
59  
60

**ABSTRACT****Background**

"Life-ending acts without explicit patient request" (LAWER) as identified in robust international studies are central in current debates on physician-assisted dying. Despite their contentiousness, little attention has been paid to their actual characteristics and to what extent they actually represent non-voluntary termination of life.

**Methods**

We analyzed the 66 cases of LAWER identified in a large-scale survey of physicians certifying a representative sample of deaths (n=6927) in Flanders, Belgium in 2007. Characteristics studied included physicians' labeling of the act, treatment course and doses used, and patient involvement in the decision.

**Results**

In the vast majority of cases the physicians (88%) did not label their acts in terms of life ending, but in terms of symptom treatment. Comparison of drug combinations and opioid doses revealed LAWER to be similar to intensified pain and symptom treatment and significantly distinct from euthanasia. In 68% of cases the patient had previously stated a wish for life ending and/or the administered drug doses had not been higher than necessary to relieve suffering.

**Interpretation**

We conclude that most of the studied cases do not fit the label of "life-ending acts without explicit patient request" or "non-voluntary life ending" in one or more of three respects: 1) a focus on symptom control; 2) a hastened death was highly unlikely; and 3) in accordance with previously expressed patient wishes. Empirical

1  
2  
3 reality requires us to take these insights to heart in the debate on  
4  
5 physician-assisted dying.  
6  
7  
8  
9  
10  
11  
12  
13  
14  
15  
16  
17  
18  
19  
20  
21  
22  
23  
24  
25  
26  
27  
28  
29  
30  
31  
32  
33  
34  
35  
36  
37  
38  
39  
40  
41  
42  
43  
44  
45  
46  
47  
48  
49  
50  
51  
52  
53  
54  
55  
56  
57  
58  
59  
60

Confidential

**INTRODUCTION**

Few issues in medical academia are as ethically pertinent and emotionally charged as assisted dying and its legal regulation. Observers worldwide are closely scrutinizing developments in Belgium and the Netherlands, where euthanasia (in legal and scientific terminology defined as lethal drug administration *at the explicit request of the patient*) and assisted suicide have been regulated since 2002, and where, among other research, repeated population-based surveys monitor developments and inform the ongoing debate [1-7]. These surveys report prevalence and characteristics of end-of-life practices, not only euthanasia but a wider array of practices, including so-termed "life-ending acts without explicit patient request" (LAWER). Researchers have so classified cases in which physicians report the administration of drugs with an explicit intention to hasten death, in the absence of a legally valid explicit patient request. By its name, the practice is often understood as physician-initiated non-voluntary or involuntary termination of life, and its mere existence in euthanasia-permissive jurisdictions is seen by some as proving the ineffectiveness of safeguards and control for legal euthanasia [8,9]. If the prevalence of LAWER increased, this would constitute evidence for an empirical "slippery slope", the notion that permitting assistance in dying will inevitably lead to undesirable practices [8-14]. Though LAWER occurs also in non-permissive countries [2,15] and rates in Belgium and the Netherlands have markedly decreased rather than increased since euthanasia regulation [6,7], LAWER remains a contentious issue in the assisted-dying debate.

1  
2  
3 Remarkably, little attention has been paid to the actual  
4 characteristics of LAWER cases. A previous publication in CMAJ  
5 comparing euthanasia and LAWER cases in Belgium identified important  
6 differences in decision making and drugs used, and raised questions  
7 about the nature of LAWER warranting more thorough examination [5].  
8 With several countries including Canada, Australia and the UK now  
9 bringing the assisted dying debate to legislative and judicial  
10 levels, clarification of LAWER practices is of immediate importance.  
11 Our aim is to revisit in detail the 66 cases of LAWER identified in  
12 a 2007 representative mail survey of physicians certifying 6927  
13 deaths in Belgium [16], in order to determine to what extent these  
14 cases in fact represent non-voluntary termination of life. For this  
15 purpose we examined the terms physicians used to denote their acts,  
16 the characteristics of drugs and doses used, and the patients'  
17 involvement in decision making.  
18  
19  
20  
21  
22  
23  
24  
25  
26  
27  
28  
29  
30  
31  
32  
33  
34

## 35 **METHOD**

### 36 *Study design*

37  
38 In 2007 we conducted a large-scale death-certificate survey in  
39 Flanders, the Dutch-speaking part of Belgium of approximately 6  
40 million inhabitants and 55.000 deaths per year. A stratified sample  
41 of all death certificates of June-November 2007 of Belgian residents  
42 (aged one year or older) was drawn by the Flemish Agency for Care  
43 and Health. Deaths were assigned to one of four strata according to  
44 cause of death and the corresponding estimated likelihood of an end-  
45 of-life practice. Sampling fractions for strata increased  
46 proportionally with this likelihood. The resulting sample comprised  
47 6927 cases, 25% of all deaths in the studied period and  
48  
49  
50  
51  
52  
53  
54  
55  
56  
57  
58  
59  
60

1  
2  
3 approximately 12% of all deaths in Flanders in 2007. Details of the  
4 survey methodology have been described elsewhere [16].

5  
6 A five-page questionnaire was sent to the physician of each sampled  
7 death, along with a letter explaining the study. Response was  
8 regarded as implicit consent to participate. If the physician had  
9 not responded after three reminders, a one-page questionnaire was  
10 sent inquiring about the reasons for non-response. Total anonymity  
11 for participating physicians and deceased patients was guaranteed  
12 through a rigorous mailing procedure involving a lawyer as  
13 intermediary between physicians and researchers. Information from  
14 the death certificates on sex, age, place of death and cause of  
15 death was encoded by the Agency for Care and Health to preclude any  
16 identification of patient or physician. The anonymity procedure was  
17 approved by the Ethical Review Boards of the University Hospitals of  
18 the Vrije Universiteit Brussel and Ghent University, and we obtained  
19 recommendations from the Belgian Medical Disciplinary Board and the  
20 Belgian Federal Privacy Commission.

### 21 *Questionnaire*

22 The questionnaire largely replicated questionnaires extensively  
23 validated in previous studies in Belgium and other European  
24 countries [1-7]. For the present study it was validated through  
25 testing by a panel of physicians. It inquired about end-of-life  
26 decisions, defined as medical practices at the end of patients'  
27 lives with a possible or certain life-shortening effect. Cases were  
28 classified as "life-ending acts without explicit request" (LAWER) if  
29 physicians answered affirmatively to the question "Was the death the  
30 consequence of the use of drugs prescribed, supplied or administered  
31 by you or another physician with the explicit intention of hastening  
32  
33  
34  
35  
36  
37  
38  
39  
40  
41  
42  
43  
44  
45  
46  
47  
48  
49  
50  
51  
52  
53  
54  
55  
56  
57  
58  
59  
60

1  
2  
3 the end of life or of enabling the patient to end their own life?"  
4  
5 and negatively to the question "Was the decision made after an  
6  
7 explicit request by the patient?". Additional questions studied in  
8  
9 this paper dealt with the drugs and doses used for the practice,  
10  
11 characteristics of treatment in the final days, whether the patient  
12  
13 had at some point expressed a wish for life to be ended, and the  
14  
15 term that best described the act according to the physicians  
16  
17 themselves (a list of predetermined options was presented, with an  
18  
19 open category 'other'). When evaluating the death-hastening  
20  
21 potential of treatments we ascribed a lethal potential to unknown  
22  
23 doses of short-acting midazolam, but not of diazepam because of its  
24  
25 long and delayed action.

#### 26 27 *Statistical analysis*

28  
29 Analyses were done with SPSS 22.0 software. The reported numbers and  
30  
31 percentages are unweighted. Statistical significance ( $p < 0.05$ ) was  
32  
33 tested with  $\chi^2$ .

## 34 35 36 37 **RESULTS**

38  
39 Table 1 shows which terms best described the LAWER practice  
40  
41 according to reporting physicians. The option "palliative sedation"  
42  
43 (68.2%) and "symptom treatment" (19.7%) were selected most often,  
44  
45 while "compassionate life ending" was chosen in 6.1% and  
46  
47 "euthanasia" never.

48  
49 Table 2 compares LAWER with euthanasia and intensified alleviation  
50  
51 of pain/symptoms (taking into account possible life shortening) with  
52  
53 respect to the drugs used and opioid doses administered in the final  
54  
55 24 hours. Significant differences emerge between LAWER and  
56  
57 euthanasia: drugs other than opioids were more often used in  
58  
59  
60

1  
2  
3 euthanasia than in LAWER (60% vs 6.1%,  $p < 0.001$ ), and if opioids had  
4 been used in euthanasia, the OME (oral morphine equivalent) dose was  
5 generally higher than in LAWER ( $p = 0.043$ ). No significant differences  
6 appear between LAWER and intensified alleviation of pain and other  
7 symptoms in the combinations of drugs used ( $p = 0.202$ ) or OME doses  
8 ( $p = 0.858$ ). In both practices opioids were used in more than 90% of  
9 cases.

10  
11 Table 3 is a summary of a case-by-case analysis of physician-  
12 reported medication used for LAWER, as well as patients' involvement  
13 in the decision. It shows that 29 of the 66 patients received opioid  
14 doses reportedly no higher than necessary to relieve end-of-life  
15 symptoms, with or without low-dose benzodiazepines (rows in blue).  
16 In another 15 cases, opioids were administered in doses reportedly  
17 higher than necessary to relieve symptoms, and 20 of the 66 patients  
18 were given strong sedatives. Twenty-three patients had ever  
19 explicitly or implicitly stated a wish for life ending (columns in  
20 blue). In total, 45 of the 66 patients (68%) had received opioid  
21 doses no higher than necessary to control their symptoms and/or had  
22 stated a wish for life ending (all blue cells).  
23  
24  
25  
26  
27  
28  
29  
30  
31  
32  
33  
34  
35  
36  
37  
38  
39  
40  
41  
42

### 43 **INTERPRETATION**

#### 44 *Summary of results*

45  
46 A majority of physicians reporting LAWER did not label their acts in  
47 terms of life ending, but rather in terms of symptom treatment.  
48 Comparison of drug combinations and opioid doses revealed LAWER to  
49 be similar to intensified pain and symptom treatment and  
50 significantly distinct from euthanasia. Finally, in 68% of cases  
51 there had been an implicit or explicit wish from the patient for  
52  
53  
54  
55  
56  
57  
58  
59  
60



1  
2  
3 life to be ended and/or the administered drug doses had not been  
4  
5 higher than necessary to relieve the patient's suffering.  
6

7  
8 *Explanation of the findings*

9  
10 This analysis has identified several characteristics of LAWER that  
11  
12 challenge the general perception of the practice. Most cases of  
13  
14 LAWER differ from non-voluntary termination of life in three  
15  
16 respects.

17  
18 First, it is clear from the way physicians themselves labeled their  
19  
20 acts that their focus was not on life ending or hastening death, but  
21  
22 rather on symptom relief and alleviation of terminal suffering. This  
23  
24 is corroborated by pharmacology that was similar to conventional  
25  
26 pain and symptom treatment that is intensified as death approaches,  
27  
28 and quite unlike euthanasia. The starting point and thought process  
29  
30 appear fundamentally different from euthanasia. Other studies,  
31  
32 including in the Netherlands, have presented similar results and  
33  
34 conclusions [17-20].

35  
36 Second, in a large number of cases actual hastened death is highly  
37  
38 improbable, particularly when opioids were used. A growing body of  
39  
40 studies report that even high-dose opioids are ineffective at  
41  
42 hastening death, especially when doses are proportionate to the  
43  
44 severity of the patient's symptoms [21-29], as in this study was  
45  
46 stated in many cases by reporting physicians. Even when physicians  
47  
48 administered doses that were higher than necessary for symptom  
49  
50 control, they still may not have hastened death. Ten of the 21  
51  
52 patients receiving medication in excess of that required for symptom  
53  
54 control without a stated wish for hastened death received only  
55  
56 opioids. Before euthanasia regulation in Belgium, intended  
57  
58 euthanasia was likewise mostly performed with high-dose opioids that  
59  
60

1  
2  
3 in a case-by-case analysis were found ineffective at ending life  
4  
5 [30]. The physicians' estimated degree of life shortening was hours  
6  
7 or a few days [5], but in the vast majority of LAWER cases this was  
8  
9 likely an overestimation of the effects of the given treatment.  
10  
11 So, if physicians were explicitly intending to cause death, why  
12  
13 would they choose minimally effective medications such as opioids?  
14  
15 Several explanations are possible for this dissonance between aims  
16  
17 and means. First, it may reflect a lack of expertise in the  
18  
19 pharmacodynamics of opioids. Second, we must consider physicians'  
20  
21 subjective semantic interpretation of "explicit intention". They may  
22  
23 have meant "hope"- hope that the patient would pass on quickly and  
24  
25 comfortably; an important difference. A similar explanation relates  
26  
27 to the survey's retrospective nature: having stated an "intention"  
28  
29 to hasten death, physicians may have applied circular logic when  
30  
31 post hoc attributing death-hastening consequences to their  
32  
33 treatment. Finally, it is possible that some physicians chose to use  
34  
35 opioids in order to avoid the scrutiny attached to the use of  
36  
37 barbiturates and muscle relaxants.  
38  
39 In any case, when hastened death using opioids was intended, the  
40  
41 contradiction between act and intention evokes an ethical divide.  
42  
43 From a consequentialist point of view the chosen treatment course  
44  
45 entailed no 'ill' effects: comfort was in all likelihood achieved  
46  
47 without hastening death, which is standard end-of-life practice and  
48  
49 preferable to forgoing effective opioid treatment and patients dying  
50  
51 in discomfort. However, from a virtue ethics perspective, in the  
52  
53 absence of the patient's request, an explicit intent to hasten death  
54  
55 is objectionable. Education of physicians on standards of decision  
56  
57 making as well as on evidence-based effects of high-dose opioids, in  
58  
59  
60

1  
2  
3 terms of life shortening potential, will contribute crucially to  
4 achieving both ethically coherent and clinically effective end-of-  
5 life practice.  
6  
7

8  
9 A third and final difference with the common perception of LAWER is  
10 that one third of patients had previously, implicitly or explicitly,  
11 expressed a wish for life ending to the physician. While this does  
12 not equate to a legally valid euthanasia request (which must be  
13 written and witnessed), it does suggest that for many LAWER cases  
14 the decision was made in accordance with the patient's previous  
15 wishes, and was not paternalistic. Such a wish was stated in half of  
16 cases where strong sedatives had been used and where therefore  
17 hastened death was more likely than in cases treated with opioids.  
18  
19 As for the other cases, one may also wish to consider them with due  
20 regard to current debates on paternalism [31].  
21  
22

23  
24 LAWER incidence in Belgium is higher than in other countries [2,15],  
25 but it has halved since the legalization of euthanasia. Neither its  
26 existence nor its incidence can thus be blamed on decriminalization  
27 of euthanasia. The present study suggests the more plausible  
28 explanation that Belgian physicians are less reluctant than their  
29 international colleagues to state or acknowledge an intention to  
30 hasten death, even if their actions are indistinguishable from  
31 intensive symptom management. If palliative care involves a  
32 physician who intends to relieve symptoms but may unintentionally  
33 hasten death (the classic "Double Effect"), while euthanasia  
34 involves a physician who unambiguously intends to hasten death, the  
35 majority of the here described LAWER cases belong to an intermediate  
36 category involving a physician who primarily intends to relieve  
37 symptoms while simultaneously hoping or expecting to hasten death.  
38  
39  
40  
41  
42  
43  
44  
45  
46  
47  
48  
49  
50  
51  
52  
53  
54  
55  
56  
57  
58  
59  
60

1  
2  
3 Previous studies have supported the idea that some physicians  
4 acknowledge such a hope or intention [32,33] and this inclination  
5 may be culturally determined. This hypothesis needs further  
6 scientific evaluation. Another possibility is that misperceptions  
7 about opioid pharmacodynamics are more prevalent in Belgium. At any  
8 rate, Belgian doctors appear more prone than physicians in other  
9 parts of the world to acknowledge accepting hastened death for the  
10 sake of serving the patient's comfort and ease of passing.  
11  
12  
13  
14  
15  
16  
17  
18  
19

#### 20 *Strengths and limitations*

21 A strength of this study is the robustness of the data it analyses,  
22 obtained with a rigorous methodology that produced a high response  
23 rate despite the medico-legal sensitivity of the subject [6,16]. A  
24 limitation is that surveys are inevitably reductionist, and cannot  
25 fully capture the complexity and diversity of clinical cases and  
26 doctor-patient interactions at the end of life. Also, we cannot  
27 exclude the possibility of poor recall in physicians' reporting,  
28 particularly of drugs and doses. Desirability bias in the source  
29 data is possible but unlikely in view of the rigorous anonymity of  
30 responses. The data in this study are probably the best that current  
31 methodology allows.  
32  
33  
34  
35  
36  
37  
38  
39  
40  
41  
42  
43  
44

#### 45 *Conclusions and recommendations for research, practice and policy*

46 We conclude that, when considering semantic hermeneutics and  
47 characteristics such as administered drugs and doses, relying on  
48 (post hoc) reported intention has its pitfalls, and important  
49 qualifications of so-termed LAWER are necessary. The majority of  
50 LAWER cases do not fit the label of "life-ending acts without  
51 explicit patient request", "non-voluntary life ending" or  
52  
53  
54  
55  
56  
57  
58  
59  
60

1  
2  
3 "involuntary life ending" in one or more of three respects: 1) the  
4 focus was on symptom control; 2) hastened death was highly unlikely;  
5  
6 and 3) the decision was in accordance with the patient's wishes. It  
7  
8 has not been our aim here to condone or justify LAWER practices or  
9  
10 to diminish their ethical significance, but rather to show that  
11  
12 "life-ending acts without explicit patient request" and "non-  
13  
14 voluntary life ending" as reported in epidemiological studies can be  
15  
16 misleading and overly alarming terms which do not reflect the  
17  
18 actual characteristics of the recorded cases. The empirical reality  
19  
20 requires us to refine our understanding and to take these insights  
21  
22 into account in the highly contentious and volatile debate on  
23  
24 physician-assisted dying. Given the prominent weight assigned to  
25  
26 LAWER, oversimplification is tempting but detrimental to the quality  
27  
28 of the debate.  
29

30  
31 To better understand the wishes of patients regarding assisted death  
32  
33 and the responses of physicians to these wishes, we propose  
34  
35 complementary research, eg as part of prospective studies on advance  
36  
37 care planning. To explore the considerations and motivations of all  
38  
39 parties, and to better distinguish LAWER from uncontroversial  
40  
41 practices, in-depth interviews with physicians, nurses, patients and  
42  
43 relatives are worthwhile [17]. Cross-national vignette studies on  
44  
45 end-of-life practices should help establish whether clinical  
46  
47 situations and end-of-life treatments are interpreted or labeled  
48  
49 differently across countries and medical cultures.  
50  
51  
52  
53  
54  
55  
56  
57  
58  
59  
60

## REFERENCES

1. Deliens L, Mortier F, Bilsen J, et al. End-of-life decisions in medical practice in Flanders, Belgium: a nationwide survey. *Lancet* 2000, 356 (9244):1806-11.
2. van der Heide A, Deliens L, Faisst K, et al. End-of-life decision-making in six European countries: descriptive study. *Lancet* 2003, 362(9381):345-50.
3. van der Heide A, Onwuteaka-Philipsen BD, Rurup ML, et al. End-of-life practices in the Netherlands under the euthanasia act. *N Engl J Med* 2007, 356:1957-65.
4. Bilsen J, Cohen J, Chambaere K, et al. Medical end-of-life practices under the euthanasia law in Belgium: a nationwide post-mortem survey. *N Engl J Med* 2009, 361:1119-21.
5. Chambaere K, Bilsen J, Cohen J, Onwuteaka-Philipsen BD, Mortier F, Deliens L. Physician-assisted deaths under the euthanasia law in Belgium: a population-based survey. *CMAJ* 2010, 182:895-901.
6. Chambaere K, Bilsen J, Cohen J, Onwuteaka-Philipsen BD, Mortier F, Deliens L. Trends in medical end-of-life decision making in Flanders, Belgium 1998-2001-2007. *Med Decis Making* 2011, 31(3):500-10.
7. Onwuteaka-Philipsen BD, Brinkman-Stoppelenburg A, Penning C, de Jong-Krul GJ, van Delden JJ, van der Heide A. Trends in end-of-life practices before and after the enactment of the euthanasia law in the Netherlands from 1990 to 2010: a repeated cross-sectional survey. *Lancet* 2012, 380(9845):908-15.
8. Pereira J. Legalizing euthanasia or assisted suicide: the illusion of safeguards and controls. *Curr Oncol* 2011, 18:e38-45.
9. Cohen-Almagor R. First do no harm: pressing concerns regarding euthanasia in Belgium. *Int J Law Psychiatry* 2013, 36(5-6):515-21.
10. Hendin H. Seduced by death: doctors, patients and the Dutch cure. *Issues Law Med* 1994, 10:123-68.
11. Shariff MJ. Assisted death and the slippery slope - finding clarity amid advocacy, convergence and complexity. *Curr Oncol* 2012, 19:143-54.
12. Golden M, Zoanni T. Killing us softly: the dangers of legalizing assisted suicide. *Disabil Health J* 2010, 3:16-30.
13. Gillon R. Euthanasia in the Netherlands - down the slippery slope? *J Med Ethics* 1999, 25:3-4.
14. Lewis P. The empirical slippery slope from voluntary to non-voluntary euthanasia. *J Law Med Ethics* 2007, 35(1):197-210.
15. Seale C. Hastening death in end-of-life care: a survey of doctors. *Soc Sci Med* 2009, 69(11):1659-66.
16. Chambaere K, Bilsen J, Cohen J, Pousset G, Onwuteaka-Philipsen B, Mortier F, Deliens L. A post-mortem survey on end-of-life

- 1  
2  
3 decisions using a representative sample of death certificates  
4 in Flanders, Belgium: research protocol. *BMC Public Health*  
5 2008, 8:299.
- 6  
7 17. Meeussen K, Van den Block L, Bossuyt N, Echteld M, Bilsen J,  
8 Deliëns L. Physician reports of medication use with explicit  
9 intention of hastening the end of life in the absence of  
10 explicit patient request in general practice in Belgium. *BMC*  
11 *Public Health* 2010, 10:186.
- 12  
13 18. Rietjens JA, Bilsen J, Fischer S, Van Der Heide A, Van Der  
14 Maas PJ, Miccinesi G, Norup M, Onwuteaka-Philipsen BD,  
15 Vrakking AM, Van Der Wal G. Using drugs to end life without an  
16 explicit request of the patient. *Death Stud* 2007, 31(3):205-  
17 21.
- 18  
19 19. Deliëns L, Ganzini L, Vander Stichele R. The use of drugs to  
20 hasten death. *Pharmacoepidemiol Drug Saf* 2004, 13(2):113-5.
- 21  
22 20. Pijnenborg L, van der Maas PJ, van Delden JJ, Looman CW. Life-  
23 terminating acts without explicit request of patient. *Lancet*  
24 1993, 341(8854):1196-9.
- 25  
26 21. Sykes N, Thorns A. Sedative use in the last week of life and  
27 the implications for end-of-life decision making. *Arch Intern*  
28 *Med* 2003, 163:341-4.
- 29  
30 22. Sykes N, Thorns A. The use of opioids and sedatives at the end  
31 of life. *Lancet Oncol* 2003, 4:312-8.
- 32  
33 23. Thorns A, Sykes N. Opioid use in last week of life and  
34 implications for end-of-life decision-making. *Lancet* 2000,  
35 356:398-9.
- 36  
37 24. Bercovitch M, Waller A, Adunsky A. High dose morphine use in  
38 the hospice setting. A database survey of patient  
39 characteristics and effect on life expectancy. *Cancer* 1999,  
40 86:871-7.
- 41  
42 25. Portenoy RK, Sibirceva U, Smout R, et al. Opioid use and  
43 survival at the end of life: a survey of a hospice population.  
44 *J Pain Symptom Manage* 2006, 32:532-40.
- 45  
46 26. Morita T, Tsunoda J, Inoue S, Chihara S. Effects of high dose  
47 opioids and sedatives on survival in terminally ill cancer  
48 patients. *J Pain Symptom Manage* 2001, 21:282-9.
- 49  
50 27. Hallenbeck J. Pathophysiologies of dyspnea explained: why  
51 might opioids relieve dyspnea and not hasten death? *J Palliat*  
52 *Med* 2012, 15:848-53.
- 53  
54 28. Fineberg IC, Wenger NS, Brown-Saltzman K. Unrestricted opiate  
55 administration for pain and suffering at the end of life:  
56 knowledge and attitudes as barriers to care. *J Palliat Med*  
57 2006, 9:873-83.
- 58  
59 29. Hanks GWC, Cherny NI (1998). Opioid analgesic therapy. In:  
60 Doyle D, Hanks GWC, MacDonald N, eds. *The Oxford textbook of  
palliative medicine*. Oxford: Oxford University Press (2nd  
edition), 331-355.

- 1
- 2
- 3 30. Vander Stichele RH, Bilsen JJ, Bernheim JL, Mortier F, Deliens
- 4 L. Drugs used for euthanasia in Flanders, Belgium.
- 5 Pharmacoepidemiol Drug Saf. 2004 Feb;13(2):89-95.
- 6
- 7 31. Levy N. The best of all possible paternalisms? J Med Ethics
- 8 2014 (Epub ahead of print).
- 9
- 10 32. Draper H, Ives J, Pall H, Smith S, Damery S, Wilson S.
- 11 Reporting end-of-life practice: can we trust doctors to be
- 12 honest? Pall Med 2009, 23:673-4.
- 13
- 14 33. Cohen L, Ganzini L, Mitchell C, Arons S, Goy E, Cleary J.
- 15 Accusations of murder and euthanasia in end-of-life care. J
- 16 Palliat Med 2005, 8(6):1096-104.
- 17
- 18
- 19
- 20
- 21
- 22
- 23
- 24
- 25
- 26
- 27
- 28
- 29
- 30
- 31
- 32
- 33
- 34
- 35
- 36
- 37
- 38
- 39
- 40
- 41
- 42
- 43
- 44
- 45
- 46
- 47
- 48
- 49
- 50
- 51
- 52
- 53
- 54
- 55
- 56
- 57
- 58
- 59
- 60

Confidential



**Table 1 - Term used for LAWER cases by physicians (n=66)**

|                           | % (n)     |
|---------------------------|-----------|
| symptom treatment         | 19.7 (13) |
| palliative sedation       | 68.2 (45) |
| compassionate life ending | 6.1 (4)   |
| euthanasia                | 0.0 (0)   |
| other                     | 6.1 (4)   |

Confidential

Table 2 - Comparison of drugs and doses used

|                                                           | Intensified<br>alleviation of pain<br>and other symptoms<br>n=1249 | LAWER<br>n=66 | Euthanasia/<br>assisted<br>suicide<br>n=142 |
|-----------------------------------------------------------|--------------------------------------------------------------------|---------------|---------------------------------------------|
| <b>Drugs used</b>                                         | (n=1199)                                                           | (n=65)        | (n=139)                                     |
| Opioids                                                   | 94.9                                                               | 93.9          | 40.0                                        |
| <i>as only drug</i>                                       | 58.6                                                               | 44.6          | 15.7                                        |
| <i>with only<br/>  benzodiazepines</i>                    | 23.7                                                               | 26.2          | 14.3                                        |
| <i>with only other<br/>  drugs</i>                        | 6.5                                                                | 12.3          | 2.1                                         |
| <i>with<br/>  benzodiazepines<br/>  and other drugs</i>   | 6.2                                                                | 10.8          | 7.9                                         |
| No opioids                                                | 5.1                                                                | 6.1           | 60.0                                        |
| <b>Chi<sup>2</sup> p-value</b>                            | .202                                                               |               | <b>&lt;.001</b>                             |
| <b>Reported OME<br/>opioid doses used<br/>in last 24h</b> | (n=821)                                                            | (n=37)        | (n=44)                                      |
| 1-119 mg                                                  | 37.8                                                               | 37.8          | 13.6                                        |
| 120-239 mg                                                | 32.5                                                               | 27.0          | 22.7                                        |
| 240-479 mg                                                | 21.8                                                               | 27.0          | 47.7                                        |
| 480+ mg                                                   | 8.3                                                                | 8.1           | 15.9                                        |
| <b>Chi<sup>2</sup> p-value</b>                            | .858                                                               |               | <b>.043</b>                                 |

\* OME=Oral Morphine Equivalent. Conversion rates were obtained from handbooks and review publications with equianalgesic tables: Knotkova H, Fine PG, Portenoy RK. Opioid rotation: the science and the limitations of the equianalgesic dose table. *J Pain Symptom Manage* 2009, 38(3):426-439; de Graeff A, Hesselman GM, Krol RJA, et al, eds. [Palliative care. Guidelines for practice]. Utrecht: VIKC, 2006 [in Dutch]. Pereira J, Lawlor P, Vigano A, Dorgan M, Bruera E. Equianalgesic dose ratios for opioids: a critical review and proposals for long-term dosing. *J Pain Symptom Manage* 2001, 22(2):672-687. Hanks GWC, Cherny NI. Opioid analgesic therapy. In: Doyle D, Hanks GWC, MacDonald N, eds. *The Oxford textbook of palliative medicine*. Oxford: Oxford University Press, 1998 (2<sup>nd</sup> edition); 331-355. Missing OME doses: Euthanasia 12/56 (21.4%); LAWER 24/61 (39.3%); Intensified alleviation of pain and other symptoms 318/1139 (27.9%).

Table 3 - Classification of LAWER cases according to drugs and doses and stated wish for life ending\*

|                                                                                          |                                                                                                                    | Stated wish to end life |           | No stated wish to end life |                 |           |
|------------------------------------------------------------------------------------------|--------------------------------------------------------------------------------------------------------------------|-------------------------|-----------|----------------------------|-----------------|-----------|
|                                                                                          |                                                                                                                    | explicit                | implicit  | patient incapable          | patient capable |           |
| <b>Opioid dose no higher than necessary for Sx control +/- low-dose benzodiazepines</b>  | stable opioid dose over final 3 days                                                                               | 1                       | 1         | 7                          | 2               | <b>11</b> |
|                                                                                          | gradual increase in opioids over final 3 days                                                                      | 1                       | 2         | 8                          | 2               | <b>13</b> |
|                                                                                          | strong increase in opioids on final day                                                                            | 2                       |           | 3                          |                 | <b>5</b>  |
| <b>Opioid doses or sedatives not normally used as part of mainstream palliative care</b> | opioid doses exceeding symptom requirements but either stable or gradually increasing +/- low-dose benzodiazepines |                         |           | 3                          | 1               | <b>4</b>  |
|                                                                                          | opioid doses exceeding symptom requirements and strongly rising on last day +/- low-dose benzodiazepines           | 3                       | 2         | 6                          |                 | <b>11</b> |
|                                                                                          | strong sedatives (barbiturates, propofol, high-dose benzodiazepines)                                               | 3                       | 7         | 9                          | 1               | <b>20</b> |
| <b>Unspecified doses of opioid and/or benzodiazepines</b>                                |                                                                                                                    |                         | 1         | 1                          |                 | <b>2</b>  |
|                                                                                          |                                                                                                                    | <b>10</b>               | <b>13</b> | <b>37</b>                  | <b>6</b>        | <b>66</b> |

\* Reported by the physicians themselves: drugs, doses, opioid course in final 3 days, and whether opioid doses were higher than necessary to relieve symptoms.

Judgments of low-dose vs high-dose benzodiazepines were made by the authors:

Low-dose benzodiazepines: Lorazepam <= 2.5mg; Diazepam <=20mg or no dose indicated; Midazolam <=2mg

High-dose benzodiazepines: Lorazepam >2.5mg; Midazolam >2mg or no dose indicated.
